# Supplementary material for: Predictive Validity of Multifactorial Injury Risk Models and Associated Clinical Measures in the U.S. Population
Source: MDPI journal article supplement (doi:10.3390/sports12050123), 2024-04-28
Supplement: s1 [file s1]

*Symptoms begin only because of injury*

|                 |       | Estimate     | Standard Error | Unweighted<br>Count |
|-----------------|-------|--------------|----------------|---------------------|
| Population Size | Yes   | 27008823.000 | 1550881.929    | 1146                |
|                 | No    | 57657161.000 | 1991156.344    | 2767                |
|                 | Total | 84665984.000 | 3030523.368    | 3913                |
| % of Total      | Yes   | 31.9%        | 1.1%           | 1146                |
|                 | No    | 68.1%        | 1.1%           | 2767                |
|                 | Total | 100.0%       | 0.0%           | 3913                |

*Bone/joint injury*

|                 |       | Estimate      | Standard Error | Unweighted<br>Count |
|-----------------|-------|---------------|----------------|---------------------|
| Population Size | No    | 269765543.000 | 7967611.958    | 19292               |
|                 | Yes   | 8886724.000   | 923183.502     | 467                 |
|                 | Total | 278652267.000 | 8335243.942    | 19759               |
| % of Total      | No    | 96.8%         | 0.3%           | 19292               |
|                 | Yes   | 3.2%          | 0.3%           | 467                 |
|                 | Total | 100.0%        | 0.0%           | 19759               |

*Symptoms begin only because of injury \* Bone/joint injury*

|                                       |                                                |                | Bone/joint injury |             |              |
|---------------------------------------|------------------------------------------------|----------------|-------------------|-------------|--------------|
| Symptoms begin only because of injury |                                                |                | No                | Yes         | Total        |
| Yes                                   | Population Size                                | Estimate       | 22925762.000      | 4083061.000 | 27008823.000 |
|                                       |                                                | Standard Error | 1375676.426       | 420822.769  | 1550881.929  |
|                                       | % within Symptoms begin only because of injury | Estimate       | 84.9%             | 15.1%       | 100.0%       |
|                                       |                                                | Standard Error | 1.3%              | 1.3%        | 0.0%         |
|                                       | % within Bone/joint injury                     | Estimate       | 29.6%             | 55.9%       | 31.9%        |
|                                       |                                                | Standard Error | 1.1%              | 3.4%        | 1.1%         |
|                                       | % of Total                                     | Estimate       | 27.1%             | 4.8%        | 31.9%        |
|                                       |                                                | Standard Error | 1.0%              | 0.5%        | 1.1%         |
|                                       | Population Size                                | Estimate       | 54429499.000      | 3227662.000 | 57657161.000 |
|                                       |                                                | Standard Error | 1899019.431       | 484468.926  | 1991156.344  |
| No                                    | % within Symptoms begin only because of injury | Estimate       | 94.4%             | 5.6%        | 100.0%       |
|                                       |                                                | Standard Error | 0.8%              | 0.8%        | 0.0%         |
|                                       | % within Bone/joint injury                     | Estimate       | 70.4%             | 44.1%       | 68.1%        |
|                                       |                                                | Standard Error | 1.1%              | 3.4%        | 1.1%         |
|                                       | % of Total                                     | Estimate       | 64.3%             | 3.8%        | 68.1%        |
|                                       |                                                | Standard Error | 1.3%              | 0.5%        | 1.1%         |
|                                       | Population Size                                | Estimate       | 77355261.000      | 7310723.000 | 84665984.000 |
|                                       |                                                | Standard Error | 2810915.804       | 774671.497  | 3030523.368  |
|                                       | % within Symptoms begin only because of injury | Estimate       | 91.4%             | 8.6%        | 100.0%       |
|                                       |                                                | Standard Error | 0.8%              | 0.8%        | 0.0%         |
| Total                                 | % within Bone/joint injury                     | Estimate       | 100.0%            | 100.0%      | 100.0%       |
|                                       |                                                | Standard Error | 0.0%              | 0.0%        | 0.0%         |
|                                       | % of Total                                     | Estimate       | 91.4%             | 8.6%        | 100.0%       |
|                                       |                                                | Standard Error | 0.8%              | 0.8%        | 0.0%         |

*Tests of Independence*

|                     |                  | Chi-Square | Adjusted F | df1 | df2 | Sig.  |
|---------------------|------------------|------------|------------|-----|-----|-------|
| Symptoms begin only | Pearson          | 97.644     | 61.263     | 1   | 29  | <.001 |
| because of injury * | Likelihood Ratio | 90.617     | 56.854     | 1   | 29  | <.001 |
| Bone/joint injury   |                  |            |            |     |     |       |

The adjusted F is a variant of the second-order Rao-Scott-adjusted Chi-square statistic. Significance is based on the adjusted F and its degrees of freedom.

*Descriptive Estimates by Injury Status*

|                                                                | <i>No injury</i> |        |                         |        | <i>Bone/joint injury</i> |        |                         |        |
|----------------------------------------------------------------|------------------|--------|-------------------------|--------|--------------------------|--------|-------------------------|--------|
|                                                                | Estimate         | S.E.   | 95% Confidence Interval |        | Estimate                 | S.E.   | 95% Confidence Interval |        |
|                                                                |                  |        | Lower                   | Upper  |                          |        | Lower                   | Upper  |
| Age at screening                                               | 34.86            | 0.38   | 34.06                   | 35.65  | 56.89                    | 1.20   | 54.42                   | 59.35  |
| Body mass index (kg/m <sup>2</sup> )                           | 25.76            | 0.12   | 25.51                   | 26.02  | 29.94                    | 0.41   | 29.08                   | 30.79  |
| Total percent fat (DXA)                                        | 32.81            | 0.13   | 32.54                   | 33.08  | 36.99                    | 0.51   | 35.94                   | 38.03  |
| Estimated VO2max (ml/kg/min)                                   | 41.10            | 0.29   | 40.50                   | 41.70  | 39.83                    | 3.46   | 32.75                   | 46.91  |
| Family PIR                                                     | 2.79             | 0.061  | 2.67                    | 2.92   | 2.35                     | 0.16   | 2.02                    | 2.68   |
| Total pain count                                               | 1.43             | 0.046  | 1.33                    | 1.52   | 6.35                     | 0.54   | 5.23                    | 7.47   |
| #wks have joint pain symptoms                                  | 22.00            | 1.09   | 19.76                   | 24.24  | 37.73                    | 1.57   | 34.51                   | 40.96  |
| Total functional difficulty                                    | 0.81             | 0.021  | 0.76                    | 0.85   | 5.28                     | 0.19   | 4.88                    | 5.69   |
| # of times past 30 days (tasks around home)                    | 10.31            | 0.38   | 9.53                    | 11.09  | 14.81                    | 1.84   | 11.03                   | 18.58  |
| Total bone mineral density (g/cm <sup>2</sup> )                | 1.10             | 0.002  | 1.09                    | 1.10   | 1.091                    | 0.0079 | 1.07                    | 1.10   |
| Bone alkaline phosphatase (ug/L)                               | 25.01            | 0.49   | 24.00                   | 26.02  | 16.45                    | 0.66   | 15.09                   | 17.82  |
| C-reactive protein(mg/dL)                                      | 0.34             | 0.0075 | 0.32                    | 0.35   | 0.53                     | 0.045  | 0.44                    | 0.62   |
| Fibrinogen (mg/dL)                                             | 364.04           | 2.78   | 358.34                  | 369.73 | 383.28                   | 7.35   | 368.24                  | 398.33 |
| Helicobacter pylori (ISR)                                      | 0.81             | 0.030  | 0.75                    | 0.884  | 1.04                     | 0.085  | 0.86                    | 1.23   |
| N-telopeptides (NTx) (nmol BCE)                                | 715.15           | 18.68  | 676.93                  | 753.37 | 418.68                   | 24.73  | 368.09                  | 469.26 |
| Average peak force (Newtons)                                   | 285.58           | 2.84   | 279.77                  | 291.39 | 244.65                   | 8.13   | 228.01                  | 261.28 |
| Peak force (Newtons)                                           | 364.29           | 2.86   | 358.43                  | 370.15 | 319.14                   | 9.14   | 300.43                  | 337.85 |
| Peak force velocity degree/seconds                             | 53.87            | 0.458  | 52.93                   | 54.81  | 46.97                    | 2.57   | 41.69                   | 52.25  |
| Hours worked last week at all jobs                             | 40.71            | 0.381  | 39.90                   | 41.53  | 36.10                    | 2.86   | 30.00                   | 42.21  |
| How long per day (minutes) (walked or bicycled)                | 43.85            | 1.13   | 41.53                   | 46.16  | 42.24                    | 5.58   | 30.82                   | 53.67  |
| How long each time (minutes) (tasks around home)               | 85.26            | 1.62   | 81.93                   | 88.59  | 88.07                    | 7.62   | 72.48                   | 103.66 |
| Number of times past 30 days (muscle strengthening activities) | 14.73            | 0.207  | 14.31                   | 15.15  | 18.09                    | 3.48   | 10.96                   | 25.22  |
| Total factor count                                             | 2.10             | 0.024  | 2.05                    | 2.15   | 3.74                     | 0.067  | 3.60                    | 3.87   |

Table shows weighted mean estimates for the total sample by reported injury status.

*Descriptive Estimates by Sex*

| Gender |      |                                                 | Estimate | Standard Error | 95% Confidence Interval |          | Population Size | Unweighted Count |
|--------|------|-------------------------------------------------|----------|----------------|-------------------------|----------|-----------------|------------------|
|        |      |                                                 |          |                | Lower                   | Upper    |                 |                  |
| Male   | Mean | Age at Screening                                | 34.44    | .392           | 33.64                   | 35.24    | 135811155.000   | 9660             |
|        |      | Body Mass Index (kg/m**2)                       | 25.6527  | .11158         | 25.4245                 | 25.8809  | 127215057.000   | 8478             |
|        |      | Total percent fat (DXA)                         | 27.2958  | .12224         | 27.0458                 | 27.5458  | 116807325.000   | 7406             |
|        |      | Estimated VO2max (ml/kg/min)                    | 45.0712  | .30782         | 44.4417                 | 45.7008  | 43111050.000    | 2822             |
|        |      | Family PIR                                      | 2.8700   | .06280         | 2.7416                  | 2.9984   | 124785377.000   | 8713             |
|        |      | Total pain count                                | 1.3763   | .06282         | 1.2478                  | 1.5047   | 135811155.000   | 9660             |
|        |      | #wks have joint pain symptoms                   | 24.73    | 1.175          | 22.33                   | 27.14    | 15010155.000    | 611              |
|        |      | Total functional difficulty                     | .7781    | .02802         | .7208                   | .8354    | 135811155.000   | 9660             |
|        |      | # of times past 30 days (tasks around home)     | 9.54     | .269           | 8.99                    | 10.09    | 67668301.000    | 3197             |
|        |      | Total Bone Mineral Density (g/cm^2)             | 1.1364   | .00236         | 1.1316                  | 1.1412   | 116807325.000   | 7406             |
|        |      | Bone alkaline phosphatase (ug/L)                | 28.9237  | .58697         | 27.7232                 | 30.1242  | 102771142.000   | 6485             |
|        |      | C-reactive protein(mg/dL)                       | .2815    | .00766         | .2659                   | .2972    | 110866513.000   | 7258             |
|        |      | Fibrinogen (mg/dL)                              | 356.53   | 3.279          | 349.82                  | 363.24   | 47229825.000    | 2533             |
|        |      | Helicobacter pylori (ISR)                       | .8349    | .03003         | .7705                   | .8994    | 55345636.000    | 3664             |
|        |      | N-telopeptides (NTx) (nmol BCE)                 | 911.88   | 30.058         | 850.40                  | 973.35   | 94671388.000    | 5409             |
|        |      | Average peak force (Newtons)                    | 336.8201 | 5.12957        | 326.3289                | 347.3113 | 26090176.000    | 1540             |
|        |      | Peak force (Newtons)                            | 440.89   | 4.953          | 430.76                  | 451.02   | 26090176.000    | 1540             |
|        |      | Peak force velocity degree/seconds              | 56.0228  | .41860         | 55.1667                 | 56.8789  | 26090176.000    | 1540             |
|        |      | Hours worked last week at all jobs              | 44.26    | .395           | 43.42                   | 45.10    | 37826994.000    | 1736             |
|        |      | How long per day (minutes) (walked or bicycled) | 47.50    | 1.773          | 43.88                   | 51.13    | 30119388.000    | 2157             |

|        |      |                                                                |          |         |          |          |               |       |
|--------|------|----------------------------------------------------------------|----------|---------|----------|----------|---------------|-------|
| Female | Mean | How long each time (minutes) (tasks around home)               | 89.90    | 1.592   | 86.64    | 93.16    | 67580252.000  | 3193  |
|        |      | Number of times past 30 days (muscle strengthening activities) | 15.37    | .296    | 14.76    | 15.97    | 39655010.000  | 2693  |
|        |      | Total factor count                                             | 2.1086   | .02412  | 2.0593   | 2.1579   | 135811155.000 | 9660  |
|        |      | Age at Screening                                               | 36.63    | .464    | 35.68    | 37.58    | 142841112.000 | 10099 |
|        |      | Body Mass Index (kg/m**2)                                      | 26.1219  | .15659  | 25.8017  | 26.4422  | 134368342.000 | 8994  |
|        |      | Total percent fat (DXA)                                        | 38.9437  | .16979  | 38.5965  | 39.2910  | 111112508.000 | 6093  |
|        |      | Estimated VO2max (ml/kg/min)                                   | 36.8379  | .28910  | 36.2467  | 37.4292  | 40170742.000  | 2693  |
|        |      | Family PIR                                                     | 2.7043   | .06168  | 2.5782   | 2.8305   | 130147364.000 | 9063  |
|        |      | Total pain count                                               | 1.7933   | .05535  | 1.6801   | 1.9065   | 142841112.000 | 10099 |
|        |      | #wks have joint pain symptoms                                  | 23.97    | 1.432   | 21.04    | 26.90    | 11338830.000  | 509   |
|        |      | Total functional difficulty                                    | 1.1207   | .02791  | 1.0636   | 1.1778   | 142841112.000 | 10099 |
|        |      | # of times past 30 days (tasks around home)                    | 11.49    | .632    | 10.20    | 12.79    | 62205668.000  | 2896  |
|        |      | Total Bone Mineral Density (g/cm^2)                            | 1.0654   | .00240  | 1.0605   | 1.0703   | 111112508.000 | 6093  |
|        |      | Bone alkaline phosphatase (ug/L)                               | 20.6216  | .54360  | 19.5098  | 21.7334  | 103956036.000 | 6411  |
|        |      | C-reactive protein(mg/dL)                                      | .4107    | .01300  | .3841    | .4373    | 114822282.000 | 7584  |
|        |      | Fibrinogen (mg/dL)                                             | 372.59   | 2.893   | 366.67   | 378.51   | 53048284.000  | 2533  |
|        |      | Helicobacter pylori (ISR)                                      | .8145    | .03488  | .7397    | .8893    | 57520476.000  | 3829  |
|        |      | N-telopeptides (NTx) (nmol BCE)                                | 503.85   | 21.768  | 459.33   | 548.38   | 97467863.000  | 5349  |
|        |      | Average peak force (Newtons)                                   | 236.5307 | 2.25055 | 231.9278 | 241.1336 | 29339000.000  | 1500  |
|        |      | Peak force (Newtons)                                           | 292.38   | 2.522   | 287.23   | 297.54   | 29363036.000  | 1502  |
|        |      | Peak force velocity degree/seconds                             | 51.3732  | .71408  | 49.9127  | 52.8336  | 29363036.000  | 1502  |
|        |      | Hours worked last week at all jobs                             | 36.13    | .547    | 34.96    | 37.29    | 31056195.000  | 1472  |

|                                                                      |        |        |        |        |               |       |
|----------------------------------------------------------------------|--------|--------|--------|--------|---------------|-------|
| How long per day<br>(minutes) (walked or<br>bicycled)                | 40.00  | 1.446  | 37.04  | 42.96  | 29383112.000  | 2135  |
| How long each time<br>(minutes) (tasks around<br>home)               | 80.42  | 2.056  | 76.21  | 84.62  | 62090571.000  | 2889  |
| Number of times past 30<br>days (muscle strengthening<br>activities) | 14.09  | .272   | 13.54  | 14.65  | 31031925.000  | 2028  |
| Total factor count                                                   | 2.2018 | .02970 | 2.1411 | 2.2626 | 142841112.000 | 10099 |

---

*Odds Ratios for Demographic Groups*

| Categories                      |                                                    | Odds Ratio | 95% Confidence Interval |       |
|---------------------------------|----------------------------------------------------|------------|-------------------------|-------|
|                                 |                                                    |            | Lower                   | Upper |
| Male sex                        | Female <sup>†</sup>                                | 1.186      | 0.986                   | 1.426 |
| Age group                       | 20-39 <sup>†</sup>                                 | .          | .                       | .     |
|                                 | 40-49                                              | 1.957*     | 1.299                   | 2.947 |
|                                 | 50-59                                              | 2.087*     | 1.373                   | 3.171 |
|                                 | 60 and above                                       | 4.824*     | 3.319                   | 7.010 |
| Education Level - Adults 20+    | Less Than 9 <sup>th</sup> Grade <sup>†</sup>       | .          | .                       | .     |
|                                 | 9-11th Grade (Includes 12th grade with no diploma) | 0.578*     | 0.353                   | 0.948 |
|                                 | High School Grad/GED or Equivalent                 | 0.530*     | 0.336                   | 0.836 |
|                                 | Some College or AA degree                          | 0.483*     | 0.321                   | 0.726 |
|                                 | College Graduate or above                          | 0.353*     | 0.205                   | 0.607 |
|                                 |                                                    |            |                         |       |
| Race/Ethnicity                  | Non-Hispanic White <sup>†</sup>                    | .          | .                       | .     |
|                                 | Non-Hispanic Black                                 | 0.788      | 0.576                   | 1.077 |
|                                 | Mexican American                                   | 0.446*     | 0.305                   | 0.653 |
|                                 | Other Race - Including Multi-Racial                | 0.524      | 0.259                   | 1.061 |
|                                 | Other Hispanic                                     | 1.288      | 0.505                   | 3.285 |
| Family PIR Tercile <sup>‡</sup> | 1.00                                               | 1.881*     | 1.226                   | 2.885 |
|                                 | 2.00                                               | 1.134      | 0.793                   | 1.622 |
|                                 | 3.00 <sup>†</sup>                                  | .          | .                       | .     |
| Veteran/Military Status         | Yes                                                | 1.512*     | 1.136                   | 2.013 |

Table shows odds ratios for the dependent variable: health problems causing difficulty from bone/joint injury. <sup>†</sup>Reference categories. <sup>‡</sup>PIR = family income to poverty level ratio. \*Significant at p<0.01.



*'Low Risk' Model Descriptive Estimates*

|      |                                                  | Estimate | Standard Error | 95% Confidence Interval |          | Population Size | Unweighted Count |
|------|--------------------------------------------------|----------|----------------|-------------------------|----------|-----------------|------------------|
|      |                                                  |          |                | Lower                   | Upper    |                 |                  |
| Mean | Age at Screening                                 | 29.25    | .394           | 28.44                   | 30.05    | 210915458.000   | 16254            |
|      | Body Mass Index (kg/m <sup>2</sup> )             | 24.0698  | .09344         | 23.8787                 | 24.2609  | 194091361.000   | 13977            |
|      | Total percent fat (DXA)                          | 31.1396  | .12550         | 30.8829                 | 31.3962  | 160615193.000   | 10019            |
|      | Estimated VO2max (ml/kg/min)                     | 41.3171  | .27774         | 40.7491                 | 41.8852  | 72804180.000    | 5104             |
|      | Family PIR                                       | 2.7000   | .06412         | 2.5689                  | 2.8312   | 193266093.000   | 14640            |
|      | Total pain count                                 | 1.2025   | .04072         | 1.1193                  | 1.2858   | 210915458.000   | 16254            |
|      | #wks have joint pain symptoms                    | 23.02    | 73.032         | 85.30                   | 384.04   | 18559260.000    | 734              |
|      | Total functional difficulty                      | .6397    | .02271         | .5933                   | .6862    | 210915458.000   | 16254            |
|      | # of times past 30 days (tasks around home)      | 10.14    | .386           | 9.35                    | 10.93    | 88591649.000    | 4242             |
|      | Total Bone Mineral Density (g/cm <sup>2</sup> )  | 1.0948   | .00227         | 1.0902                  | 1.0995   | 160615193.000   | 10019            |
|      | Bone alkaline phosphatase (ug/L)                 | 28.0806  | .58757         | 26.8789                 | 29.2823  | 150174764.000   | 9969             |
|      | C-reactive protein(mg/dL)                        | .2882    | .00830         | .2713                   | .3052    | 168922334.000   | 11899            |
|      | Fibrinogen (mg/dL)                               | 356.25   | 3.417          | 349.27                  | 363.24   | 46614164.000    | 2247             |
|      | Helicobacter pylori (ISR)                        | .7404    | .02748         | .6814                   | .7993    | 82867190.000    | 5870             |
|      | N-telopeptides (NTx) (nmol BCE)                  | 849.85   | 23.823         | 801.13                  | 898.58   | 133679528.000   | 7719             |
|      | Average peak force (Newtons)                     | 266.1716 | 3.81554        | 258.3680                | 273.9753 | 23295304.000    | 1259             |
|      | Peak force (Newtons)                             | 338.95   | 4.599          | 329.55                  | 348.36   | 23295304.000    | 1259             |
|      | Peak force velocity degree/seconds               | 53.0039  | .71218         | 51.5473                 | 54.4605  | 23295304.000    | 1259             |
|      | Hours worked last week at all jobs               | 55.76    | 15.902         | 21.87                   | 89.66    | 47092471.000    | 2304             |
|      | How long per day (minutes) (walked or bicycled)  | 43.74    | 1.825          | 40.01                   | 47.47    | 46396902.000    | 3617             |
|      | How long each time (minutes) (tasks around home) | 81.86    | 1.391          | 79.02                   | 84.71    | 88416678.000    | 4233             |

|                                                                |        |        |        |        |               |       |
|----------------------------------------------------------------|--------|--------|--------|--------|---------------|-------|
| Number of times past 30 days (muscle strengthening activities) | 14.79  | .198   | 14.39  | 15.20  | 70035821.000  | 4685  |
| Total factor count                                             | 1.5423 | .01567 | 1.5103 | 1.5744 | 210915458.000 | 16254 |

Tables shows population descriptive estimates for those not selected to models 1, 2, or 3.

*Model 1 Descriptive Estimates*

|      |                                             | 95% Confidence Interval |                |          |          | Unweighted      |       |
|------|---------------------------------------------|-------------------------|----------------|----------|----------|-----------------|-------|
|      |                                             | Estimate                | Standard Error | Lower    | Upper    | Population Size | Count |
| Mean | Age at Screening                            | 55.53                   | .313           | 54.89    | 56.17    | 39129484.000    | 2094  |
|      | Body mass index (kg/m²)                     | 30.9199                 | .15265         | 30.6077  | 31.2321  | 38942758.000    | 2090  |
|      | Total percent fat (DXA)                     | 37.0581                 | .19668         | 36.6559  | 37.4604  | 38799543.000    | 2081  |
|      | Estimated VO2max (ml/kg/min)                | 38.9464                 | .82935         | 37.2502  | 40.6427  | 6335380.000     | 266   |
|      | Family PIR                                  | 3.1563                  | .08123         | 2.9902   | 3.3225   | 35498091.000    | 1865  |
|      | Total pain count                            | 1.5355                  | .07410         | 1.3839   | 1.6870   | 39129484.000    | 2094  |
|      | #wks have joint pain symptoms               | 23.03                   | 1.888          | 19.17    | 26.89    | 4023901.000     | 184   |
|      | Total functional difficulty                 | 1.4229                  | .05840         | 1.3034   | 1.5423   | 39129484.000    | 2094  |
|      | # of times past 30 days (tasks around home) | 10.79                   | .608           | 9.55     | 12.03    | 24335268.000    | 1109  |
|      | Bone mineral density (g/cm^2)               | 1.1214                  | .00358         | 1.1141   | 1.1287   | 38799543.000    | 2081  |
|      | Bone alkaline phosphatase (ug/L)            | 15.6448                 | .27831         | 15.0756  | 16.2140  | 32827983.000    | 1751  |
|      | C-reactive protein(mg/dL)                   | 0.4977                  | .01890         | .4591    | .5364    | 33016958.000    | 1765  |
|      | Fibrinogen (mg/dL)                          | 372.74                  | 3.457          | 365.67   | 379.81   | 31546751.000    | 1695  |
|      | Helicobacter pylori (ISR)                   | 1.0677                  | .05746         | .9445    | 1.1910   | 17171411.000    | 960   |
|      | N-telopeptides (NTx) (nmol BCE)             | 374.93                  | 10.487         | 353.48   | 396.38   | 34175462.000    | 1832  |
|      | Average peak force (Newtons)                | 302.3642                | 3.92549        | 294.3357 | 310.3928 | 19188241.000    | 1100  |
|      | Peak force (Newtons)                        | 386.10                  | 4.535          | 376.82   | 395.37   | 19212277.000    | 1102  |
|      | Peak force velocity degree/seconds          | 54.3349                 | .63448         | 53.0373  | 55.6326  | 19212277.000    | 1102  |

|                                                                |        |        |        |        |              |      |
|----------------------------------------------------------------|--------|--------|--------|--------|--------------|------|
| Hours worked last week at all jobs                             | 42.52  | .783   | 40.85  | 44.19  | 13269172.000 | 568  |
| How long per day (minutes) (walked or bicycled)                | 42.89  | 2.336  | 38.11  | 47.67  | 8095282.000  | 424  |
| How long each time (minutes) (tasks around home)               | 92.63  | 3.993  | 84.47  | 100.80 | 24335268.000 | 1109 |
| Number of times past 30 days (muscle strengthening activities) | 17.31  | 3.372  | 10.42  | 24.21  | 346848.000   | 25   |
| Total factor count                                             | 3.5287 | .01749 | 3.4929 | 3.5645 | 39129484.000 | 2094 |

Table shows population descriptive estimates for Model 1. Model 1=  $\geq 3$  individual factors (Age  $\geq 40$  yrs., physical activity level = 1 or 2, BMI category 'overweight' or 'obese,' answer 'no' to muscle strengthening activities).

*Model 2 Descriptive Estimates*

|      |                                                  | 95% Confidence Interval |                |          |          | Unweighted      |       |
|------|--------------------------------------------------|-------------------------|----------------|----------|----------|-----------------|-------|
|      |                                                  | Estimate                | Standard Error | Lower    | Upper    | Population Size | Count |
| Mean | Age at Screening                                 | 54.77                   | .526           | 53.70    | 55.85    | 28607325.000    | 1411  |
|      | Body Mass Index (kg/m²)                          | 31.4376                 | .25941         | 30.9071  | 31.9682  | 28549280.000    | 1405  |
|      | Total percent fat (DXA)                          | 37.7533                 | .29791         | 37.1440  | 38.3625  | 28505097.000    | 1399  |
|      | Estimated VO2max (ml/kg/min)                     | 40.5765                 | .93825         | 38.6576  | 42.4955  | 4142232.000     | 145   |
|      | Family PIR                                       | 4.5216                  | .19724         | 4.1182   | 4.9250   | 28607325.000    | 1411  |
|      | Total pain count                                 | 2.9129                  | .07607         | 2.7573   | 3.0685   | 26168557.000    | 1271  |
|      | #wks have joint pain symptoms                    | 31.78                   | 1.849          | 28.00    | 35.56    | 4159578.000     | 217   |
|      | Total functional difficulty                      | 2.6267                  | .10712         | 2.4076   | 2.8458   | 28607325.000    | 1411  |
|      | # of times past 30 days (tasks around home)      | 11.75                   | .728           | 10.26    | 13.24    | 16947052.000    | 742   |
|      | Total Bone Mineral Density (g/cm^2)              | 1.1144                  | .00447         | 1.1052   | 1.1235   | 28505097.000    | 1399  |
|      | Bone alkaline phosphatase (ug/L)                 | 16.2564                 | .33859         | 15.5639  | 16.9489  | 23724431.000    | 1176  |
|      | C-reactive protein(mg/dL)                        | 0.5577                  | .03275         | .4907    | .6247    | 23749503.000    | 1178  |
|      | Fibrinogen (mg/dL)                               | 372.51                  | 3.603          | 365.14   | 379.88   | 22117194.000    | 1124  |
|      | Helicobacter pylori (ISR)                        | 1.0427                  | .04704         | .9418    | 1.1436   | 12827511.000    | 663   |
|      | N-telopeptides (NTx) (nmol BCE)                  | 371.32                  | 12.207         | 346.35   | 396.29   | 24284261.000    | 1207  |
|      | Average peak force (Newtons)                     | 287.7328                | 4.69503        | 278.1304 | 297.3352 | 12945631.000    | 681   |
|      | Peak force (Newtons)                             | 368.80                  | 5.007          | 358.56   | 379.04   | 12945631.000    | 681   |
|      | Peak force velocity degree/seconds               | 53.4140                 | 1.05263        | 51.2611  | 55.5668  | 12945631.000    | 681   |
|      | Hours worked last week at all jobs               | 42.55                   | 1.015          | 40.38    | 44.71    | 8531278.000     | 337   |
|      | How long per day (minutes) (walked or bicycled)  | 45.81                   | 5.208          | 35.16    | 56.47    | 5010316.000     | 251   |
|      | How long each time (minutes) (tasks around home) | 93.16                   | 3.996          | 84.99    | 101.33   | 16918877.000    | 740   |

|                                                                      |        |        |        |        |              |      |
|----------------------------------------------------------------------|--------|--------|--------|--------|--------------|------|
| Number of times past 30 days<br>(muscle strengthening<br>activities) | 14.78  | 2.225  | 10.23  | 19.34  | 304266.000   | 11   |
| Total factor count                                                   | 4.8070 | .01601 | 4.7743 | 4.8397 | 28607325.000 | 1411 |

Table shows population descriptive estimates for Model 2. Model 2= Model 1 + low back pain (During the past 3 months], did {you/SP} have low back pain?).

*Model 3 Descriptive Estimates*

|      |                                                  | Estimate | Standard Error | 95% Confidence Interval |          | Population Size | Unweighted Count |
|------|--------------------------------------------------|----------|----------------|-------------------------|----------|-----------------|------------------|
|      |                                                  |          |                | Lower                   | Upper    |                 |                  |
| Mean | Age at Screening                                 | 55.80    | .606           | 54.56                   | 57.03    | 21442668.000    | 1033             |
|      | Body Mass Index (kg/m²)                          | 31.8292  | .26353         | 31.2902                 | 32.3681  | 21384623.000    | 1027             |
|      | Total percent fat (DXA)                          | 38.7077  | .23375         | 38.2296                 | 39.1858  | 21340440.000    | 1021             |
|      | Estimated VO2max (ml/kg/min)                     | 39.8928  | 1.16317        | 37.5139                 | 42.2718  | 2095033.000     | 68               |
|      | Family PIR                                       | 2.8690   | .08374         | 2.6978                  | 3.0403   | 19717072.000    | 937              |
|      | Total pain count                                 | 6.0325   | .23979         | 5.5420                  | 6.5229   | 21442668.000    | 1033             |
|      | #wks have joint pain symptoms                    | 31.92    | 1.837          | 28.16                   | 35.67    | 4140312.000     | 215              |
|      | Total functional difficulty                      | 3.1526   | .13469         | 2.8771                  | 3.4281   | 21442668.000    | 1033             |
|      | # of times past 30 days (tasks around home)      | 11.82    | .876           | 10.03                   | 13.61    | 12682795.000    | 560              |
|      | Total Bone Mineral Density (g/cm^2)              | 1.1079   | .00360         | 1.1005                  | 1.1153   | 21340440.000    | 1021             |
|      | Bone alkaline phosphatase (ug/L)                 | 16.2457  | .39134         | 15.4453                 | 17.0461  | 17489803.000    | 843              |
|      | C-reactive protein(mg/dL)                        | .6102    | .03969         | .5290                   | .6914    | 17498019.000    | 844              |
|      | Fibrinogen (mg/dL)                               | 376.26   | 4.093          | 367.89                  | 384.63   | 16599731.000    | 811              |
|      | Helicobacter pylori (ISR)                        | 1.0445   | .07003         | .8943                   | 1.1947   | 9172443.000     | 459              |
|      | N-telopeptides (NTx) (nmol BCE)                  | 365.15   | 15.240         | 333.98                  | 396.32   | 18008699.000    | 870              |
|      | Average peak force (Newtons)                     | 284.2546 | 5.39662        | 273.2172                | 295.2919 | 10202440.000    | 506              |
|      | Peak force (Newtons)                             | 364.34   | 5.254          | 353.60                  | 375.09   | 10202440.000    | 506              |
|      | Peak force velocity degree/seconds               | 52.7408  | 1.25778        | 50.1683                 | 55.3132  | 10202440.000    | 506              |
|      | Hours worked last week at all jobs               | 42.09    | 1.104          | 39.74                   | 44.45    | 6336435.000     | 247              |
|      | How long per day (minutes) (walked or bicycled)  | 48.55    | 7.283          | 33.66                   | 63.45    | 3635455.000     | 174              |
|      | How long each time (minutes) (tasks around home) | 95.52    | 4.803          | 85.70                   | 105.35   | 12682795.000    | 560              |

|                                                                |        |        |        |        |              |      |
|----------------------------------------------------------------|--------|--------|--------|--------|--------------|------|
| Number of times past 30 days (muscle strengthening activities) | 14.52  | 2.932  | 8.52   | 20.52  | 224902.000   | 7    |
| Total factor count                                             | 5.0489 | .00780 | 5.0329 | 5.0648 | 21442668.000 | 1033 |

Table shows population descriptive estimates for Model 3. Model 3= Model 2 + > 1 region-specific pain point

#### *Model Regression*

|         |            |                         |       | <i>Age-Adjusted</i> |                         |       |
|---------|------------|-------------------------|-------|---------------------|-------------------------|-------|
|         | Odds Ratio | 95% Confidence Interval |       | Odds Ratio          | 95% Confidence Interval |       |
|         |            | Lower                   | Upper |                     | Lower                   | Upper |
| Model 1 | 2.237*     | 1.714                   | 2.920 | 0.928               | 0.713                   | 1.208 |
| Model 2 | 2.936*     | 2.064                   | 4.178 | 1.557*              | 1.111                   | 2.182 |
| Model 3 | 4.043*     | 2.877                   | 5.681 | 2.145*              | 1.540                   | 2.987 |

Table shows odds ratios for membership to each model. Dependent variable: health problems causing difficulty from bone/joint injury. \*Significant at  $p < 0.01$ . Model 1:  $\geq 3$  lifestyle factors. (Age  $\geq 40$  yrs., physical activity level = 1 or 2, BMI category 'overweight' or 'obese,' answer 'no' to muscle-strengthening activities)

Model 2: Model 1 + low back pain (During the past 3 months], did {you/SP} have low back pain?)

Model 3: Model 2 + > 1 region-specific pain point

*ROC Curves of Pain and Functional Difficulty Count by Selection to At-Risk Group*

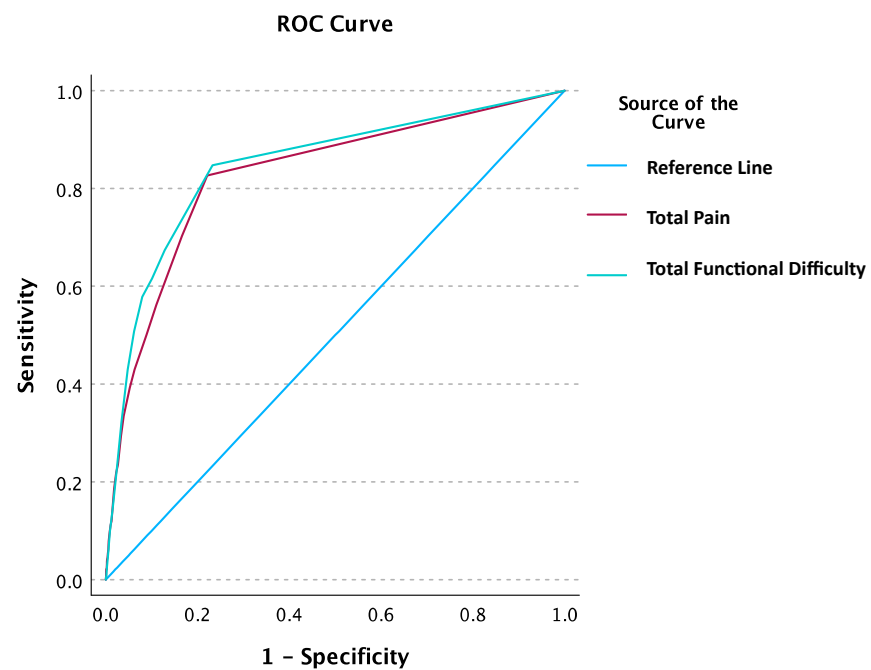

Graph shows ROC curve for total pain and total functional difficulty in respondents selected for the following injury factors: BMI  $\geq 30$  kg/m<sup>2</sup>, age  $\geq 40$  years, muscle strengthening activities = 'No,' physical activity level = {you sit/he/she sits} during the day and {do/does} not walk about very much, low back pain = 'Yes.'



*ROC Classifier Evaluation Metrics (for Figure 1)*

| Test Result Variable(s)     | Gini Index | K-S Statistics |        |
|-----------------------------|------------|----------------|--------|
|                             |            | Max K-S        | Cutoff |
| Total pain count            | .657       | .606           | .5000  |
| Total functional difficulty | .691       | .614           | .5000  |

Table displays inequality index (Gini), distribution comparison, and cut-off values for the classifier (selected to injury factor group).

*ROC Classifier Evaluation Metrics (for Figure 2)*

| Test Result Variable(s)     | Gender   | Gini Index | K-S Statistics |        |
|-----------------------------|----------|------------|----------------|--------|
|                             |          |            | Max K-S        | Cutoff |
| Total pain count            | = Male   | .588       | .560           | .5000  |
|                             | = Female | .690       | .625           | .5000  |
| Total functional difficulty | = Male   | .651       | .590           | .5000  |
|                             | = Female | .712       | .629           | .5000  |

Table displays inequality index (Gini), distribution comparison, and cut-off values for the classifier (selected to injury factor group) by sex.

*Independent-Group Area Difference Under the ROC Curve (for Figure 2)*

| Test Result Variable(s)     | Asymptotic |               | AUC Difference | Std. Error Difference | Asymptotic 95% Confidence Interval |             |
|-----------------------------|------------|---------------|----------------|-----------------------|------------------------------------|-------------|
|                             | z          | Sig. (2-tail) |                |                       | Lower Bound                        | Upper Bound |
| Total pain count            | -1.594     | .111          | -.051          | .032                  | -.114                              | .012        |
| Total functional difficulty | -1.007     | .314          | -.031          | .030                  | -.090                              | .029        |

*Note:* Table displays Z-test statistics for sex group differences in area under the ROC curve for injury factor group selection as a classifier for pain and functional difficulty count.

*Area Under the ROC Curve*

| Test Result Variable(s)     | Area | Std. Error | Asymptotic Sig. | Asymptotic 95% Confidence Interval |             |
|-----------------------------|------|------------|-----------------|------------------------------------|-------------|
|                             |      |            |                 | Lower Bound                        | Upper Bound |
| Unweighted N=242            |      |            |                 |                                    |             |
| Total pain count            | .829 | .015       | .000            | .799                               | .858        |
| Total functional difficulty | .845 | .014       | .000            | .817                               | .874        |

Graph/table shows ROC curve for total pain and total functional difficulty in respondents selected for the following injury factors: BMI  $\geq 30$  kg/m<sup>2</sup>, age  $\geq 40$  years, muscle strengthening activities = 'No,' physical activity level = {you sit/he/she sits} during the day and {do/does} not walk about very much, low back pain = 'Yes.'

*Area Under the ROC Curve by Sex*

| Test Result Variable(s)     | Sex            | Area | Std. Error | Asymptotic Sig. | Asymptotic 95% Confidence Interval |             |
|-----------------------------|----------------|------|------------|-----------------|------------------------------------|-------------|
|                             |                |      |            |                 | Lower Bound                        | Upper Bound |
| Total pain count            | Male (n=86)    | .794 | .027       | .000            | .740                               | .847        |
|                             | Female (n=156) | .845 | .017       | .000            | .811                               | .879        |
| Total functional difficulty | Male (n=86)    | .825 | .025       | .000            | .776                               | .874        |
|                             | Female (n=156) | .856 | .017       | .000            | .822                               | .890        |

*Note:* Graph/table shows ROC curve comparison by sex for total pain and total functional difficulty selected for the following injury factors: BMI  $\geq 30$  kg/m<sup>2</sup>, age  $\geq 40$  years, muscle strengthening activities = 'No,' physical activity level = {you sit/he/she sits} during the day and {do/does} not walk about very much, low back pain = 'Yes.'

*Independent-Group Area Difference Under the ROC Curve*

| Test Result Variable(s)     | Asymptotic |               | AUC Difference | Std. Error Difference | Asymptotic 95% Confidence Interval |             |
|-----------------------------|------------|---------------|----------------|-----------------------|------------------------------------|-------------|
|                             | z          | Sig. (2-tail) |                |                       | Lower Bound                        | Upper Bound |
| Total pain count            | -1.594     | .111          | -.051          | .032                  | -.114                              | .012        |
| Total functional difficulty | -1.007     | .314          | -.031          | .030                  | -.090                              | .029        |

*Case-Control Covariate Differences*

| Health problems<br>causing difficulty<br>from bone/joint<br>injury count<br>(N=934) | Control (n=467) |       | Injury (n=467) |       | Median<br>Difference |
|-------------------------------------------------------------------------------------|-----------------|-------|----------------|-------|----------------------|
|                                                                                     | Median          | IQR   | Median         | IQR   |                      |
| Age at screening                                                                    | 33.00           | 35    | 57.00          | 27    | 24.00                |
| Body mass index<br>(kg/m <sup>2</sup> )                                             | 24.33           | 9.77  | 28.8300        | 8.68  | 4.50                 |
| Total percent fat<br>(DXA)                                                          | 32.4000         | 13.90 | 38.1000        | 14.10 | 5.70                 |
| Estimated<br>VO2max<br>(ml/kg/min)                                                  | 40.3300         | 11.29 | 38.20          | 14.02 | -2.13                |
| Family PIR                                                                          | 2.4000          | 3.20  | 1.85           | 2.95  | -0.55                |
| Total pain count                                                                    | 0.0000          | 1.00  | 4.00           | 7.00  | 4.00                 |
| #wks have joint<br>pain symptoms                                                    | 0.00            | 1.00  | 4.00           | 52.00 | 3.00                 |
| Total functional<br>difficulty                                                      | 0.0000          | 1.00  | 5.00           | 5.00  | 5.00                 |
| Total Bone Mineral<br>Density (g/cm <sup>2</sup> )                                  | 1.112           | 0.18  | 1.092          | 0.19  | -0.02                |

|                                                  |        |        |         |        |        |
|--------------------------------------------------|--------|--------|---------|--------|--------|
| Bone alkaline phosphatase (ug/L)                 | 16.20  | 9.60   | 15.20   | 8.50   | -1.00  |
| C-reactive protein (mg/dL)                       | 0.1700 | 0.35   | 0.29    | 0.47   | 0.12   |
| Fibrinogen (mg/dL)                               | 356.00 | 97.00  | 369.00  | 91.00  | 13.00  |
| Helicobacter pylori (ISR)                        | 0.27   | 1.03   | 0.4200  | 1.72   | 0.15   |
| N-telopeptides (NTx) (nmol BCE)                  | 381.00 | 600.00 | 318.00  | 348.00 | -63.00 |
| Average peak force (Newtons)                     | 254.80 | 134.60 | 238.50  | 112.30 | -16.30 |
| Peak force (Newtons)                             | 316.00 | 173.00 | 313.00  | 169.00 | -3.00  |
| Peak force velocity (degree/seconds)             | 60.75  | 1.00   | 60.7500 | 2.75   | 0.00   |
| Hours worked last week at all jobs               | 40.00  | 18.00  | 36.00   | 20.00  | -4.00  |
| Number of times past 30 days (tasks around home) | 3.00   | 9.00   | 3.00    | 9.00   | 0.00   |

|                                                                            |        |       |        |       |        |
|----------------------------------------------------------------------------|--------|-------|--------|-------|--------|
| Number of times<br>past 30 days<br>(walked or<br>bicycled)                 | 0.00   | 1.00  | 0.00   | 2.00  | 0.00   |
| How long per day<br>(minutes) (walked<br>or bicycled)                      | 0.00   | 20.00 | 0.00   | 30.00 | 0.00   |
| How long each<br>time (minutes)<br>(tasks around<br>home)                  | 30.00  | 60.00 | 20.00  | 90.00 | -10.00 |
| Number of times<br>past 30 days<br>(muscle<br>strengthening<br>activities) | 0.00   | 9.00  | 0.00   | 8.00  | 0.00   |
| Total factor count                                                         | 2.0000 | 3.00  | 4.0000 | 1.00  | 2.00   |

Table shows covariate values and median differences between the case-control groups.

*Adjusted Odds Ratios for Selection to the Injury Group*

|                                         | Units of<br>Change | Odds Ratio | 95% Confidence Interval |       |
|-----------------------------------------|--------------------|------------|-------------------------|-------|
|                                         |                    |            | Lower                   | Upper |
| Age at screening                        | 24.00              | 1.16       | 0.673                   | 1.995 |
| Body mass index<br>(kg/m <sup>2</sup> ) | 4.50               | 1.01       | 0.735                   | 1.39  |
| Bone alkaline<br>phosphatase (ug/L)     | 1.00               | 0.998      | 0.967                   | 1.03  |
| Total percent fat<br>(DXA)              | 5.70               | 1.04       | 0.813                   | 1.33  |
| Total pain count                        | 4.00               | 1.22       | 0.731                   | 2.05  |
| Total functional<br>difficulty          | 5.00               | 8.57*      | 3.80                    | 19.32 |
| N-telopeptides (NTx)<br>(nmol BCE)      | 63.00              | 0.99       | 0.955                   | 1.027 |
| Total factor count                      | 2.00               | 1.42       | 0.748                   | 2.70  |

Dependent Variable: injury group. Odds ratios were adjusted for age, BMI, BAP, NTx, TPF, total functional difficulty, total pain, and total factors. Total factors included age  $\geq 40$  year, BMI  $\geq 25$  kg/m<sup>2</sup>, PAL = {you sit/he/she sits} during the day and {do/does} not walk about very much OR {you stand or walk/he/she stands or walks} about a lot during the day, but {do/does} not have to carry or lift things very often, no muscle strengthening activities, veteran/military status, and low back pain. \*Significant at  $p < 0.01$ .

*Principal Component Structure Matrix*

|                                         | Component |        |        |        |
|-----------------------------------------|-----------|--------|--------|--------|
|                                         | 1         | 2      | 3      | 4      |
| Body mass index (kg/m <sup>2</sup> )    | -0.038    | 0.321  | -0.709 | 0.076  |
| Age at screening                        | 0.071     | -0.716 | -0.191 | 0.243  |
| Bone alkaline phosphatase (ug/L)        | 0.603     | -0.205 | -0.002 | 0.039  |
| N-telopeptides (NTx) (nmol BCE)         | 0.604     | 0.336  | 0.175  | -0.074 |
| Avg level of physical activity each day | -0.144    | 0.327  | 0.668  | 0.083  |
| Low back pain                           | 0.090     | 0.687  | -0.195 | 0.104  |
| Muscle strengthening activities         | -0.404    | 0.014  | 0.373  | -0.618 |
| Veteran/Military status                 | 0.198     | 0.077  | -0.211 | -0.810 |
| Family income to poverty ratio tercile  | -0.675    | -0.035 | 0.250  | -0.011 |

Only cases for which 'Injury=Yes' are used in the analysis phase. KMO = 0.55. Bartlett's test of sphericity:  $p < 0.001$ . Rotation method: Oblimin with Kaiser Normalization.

*Odds Ratios for Bone/Joint Injury by Pain Count, Functional Difficulty Count, and Total Injury Factors*

| Test Variables              | Odds Ratio | 95% Confidence Interval |       |
|-----------------------------|------------|-------------------------|-------|
|                             |            | Lower                   | Upper |
| Total pain                  | 1.146*     | 1.114                   | 1.178 |
| Total functional difficulty | 1.405*     | 1.355                   | 1.457 |

|               |        |       |       |
|---------------|--------|-------|-------|
| Total factors | 2.024* | 1.867 | 2.194 |
|---------------|--------|-------|-------|

Dependent variable: health problems causing difficulty from bone/joint injury. Total injury factors included age  $\geq$  40 years, BMI  $\geq$  25 kg/m<sup>2</sup>, PAL = {you sit/he/she sits} during the day and {do/does} not walk about very much OR {you stand or walk/he/she stands or walks} about a lot during the day, but {do/does} not have to carry or lift things very often, no muscle strengthening activities, veteran/military status, and low back pain.\*Significant at  $p < 0.01$ .

*Underlying Bone Condition by Case-Control Group*

|                                          |                                                   |                         |                         |       | Case control group |             |              |             |
|------------------------------------------|---------------------------------------------------|-------------------------|-------------------------|-------|--------------------|-------------|--------------|-------------|
| Ever told had osteoporosis/brittle bones |                                                   |                         |                         |       | Control            | Injury      | Total        |             |
| No                                       | Population Size                                   | Estimate                |                         |       | 4417414.000        | 7364286.000 | 11781700.000 |             |
|                                          |                                                   | Standard Error          |                         |       | 396438.433         | 742003.472  | 912308.000   |             |
|                                          |                                                   | 95% Confidence Interval | Lower                   |       | 3606606.366        | 5846718.505 | 9915820.636  |             |
|                                          |                                                   |                         | Upper                   |       | 5228221.634        | 8881853.495 | 13647579.364 |             |
|                                          |                                                   | Unweighted Count        |                         |       | 206                | 395         | 601          |             |
|                                          | % within Ever told had osteoporosis/brittle bones | Estimate                |                         |       | 37.5%              | 62.5%       | 100.0%       |             |
|                                          |                                                   | Standard Error          |                         |       | 2.8%               | 2.8%        | 0.0%         |             |
|                                          |                                                   | 95% Confidence Interval | Lower                   |       | 31.9%              | 56.6%       | 100.0%       |             |
|                                          |                                                   |                         | Upper                   |       | 43.4%              | 68.1%       | 100.0%       |             |
|                                          |                                                   | Unweighted Count        |                         |       | 206                | 395         | 601          |             |
|                                          | % within case control group                       | Estimate                |                         |       | 95.6%              | 83.8%       | 87.9%        |             |
|                                          |                                                   | Standard Error          |                         |       | 2.3%               | 1.8%        | 1.4%         |             |
|                                          |                                                   | 95% Confidence Interval | Lower                   |       | 87.8%              | 79.8%       | 84.6%        |             |
|                                          |                                                   |                         | Upper                   |       | 98.5%              | 87.1%       | 90.5%        |             |
|                                          |                                                   | Unweighted Count        |                         |       | 206                | 395         | 601          |             |
|                                          | % of Total                                        | Estimate                |                         |       | 32.9%              | 54.9%       | 87.9%        |             |
|                                          |                                                   | Standard Error          |                         |       | 2.7%               | 2.3%        | 1.4%         |             |
|                                          |                                                   | 95% Confidence Interval | Lower                   |       | 27.7%              | 50.2%       | 84.6%        |             |
|                                          |                                                   |                         | Upper                   |       | 38.7%              | 59.6%       | 90.5%        |             |
|                                          |                                                   | Unweighted Count        |                         |       | 206                | 395         | 601          |             |
|                                          | Yes                                               | Population Size         | Estimate                |       |                    | 203886.000  | 1425338.000  | 1629224.000 |
|                                          |                                                   |                         | Standard Error          |       |                    | 110013.343  | 258392.258   | 269218.731  |
|                                          |                                                   |                         | 95% Confidence Interval | Lower |                    | -21116.550  | 896866.494   | 1078609.872 |
|                                          |                                                   |                         |                         | Upper |                    | 428888.550  | 1953809.506  | 2179838.128 |
|                                          |                                                   |                         | Unweighted Count        |       |                    | 206         | 395          | 601         |



|       |                                                   |                         |       |             |              |              |
|-------|---------------------------------------------------|-------------------------|-------|-------------|--------------|--------------|
| Total | % within Ever told had osteoporosis/brittle bones | Unweighted Count        |       | 7           | 66           | 73           |
|       |                                                   | Estimate                |       | 12.5%       | 87.5%        | 100.0%       |
|       |                                                   | Standard Error          |       | 6.4%        | 6.4%         | 0.0%         |
|       |                                                   | 95% Confidence Interval | Lower | 4.1%        | 67.7%        | 100.0%       |
|       |                                                   |                         | Upper | 32.3%       | 95.9%        | 100.0%       |
|       | % within case control group                       | Unweighted Count        |       | 7           | 66           | 73           |
|       |                                                   | Estimate                |       | 4.4%        | 16.2%        | 12.1%        |
|       |                                                   | Standard Error          |       | 2.3%        | 1.8%         | 1.4%         |
|       |                                                   | 95% Confidence Interval | Lower | 1.5%        | 12.9%        | 9.5%         |
|       |                                                   |                         | Upper | 12.2%       | 20.2%        | 15.4%        |
|       | % of Total                                        | Unweighted Count        |       | 7           | 66           | 73           |
|       |                                                   | Estimate                |       | 1.5%        | 10.6%        | 12.1%        |
|       |                                                   | Standard Error          |       | 0.8%        | 1.4%         | 1.4%         |
|       |                                                   | 95% Confidence Interval | Lower | 0.5%        | 8.1%         | 9.5%         |
|       |                                                   |                         | Upper | 4.5%        | 13.9%        | 15.4%        |
|       | Population Size                                   | Unweighted Count        |       | 7           | 66           | 73           |
|       |                                                   | Estimate                |       | 4621300.000 | 8789624.000  | 13410924.000 |
|       |                                                   | Standard Error          |       | 423558.419  | 944052.659   | 1095939.198  |
|       |                                                   | 95% Confidence Interval | Lower | 3755025.767 | 6858819.517  | 11169476.666 |
|       |                                                   |                         | Upper | 5487574.233 | 10720428.483 | 15652371.334 |
|       | % within Ever told had osteoporosis/brittle bones | Unweighted Count        |       | 213         | 461          | 674          |
|       |                                                   | Estimate                |       | 34.5%       | 65.5%        | 100.0%       |
|       |                                                   | Standard Error          |       | 2.9%        | 2.9%         | 0.0%         |
|       |                                                   | 95% Confidence Interval | Lower | 28.8%       | 59.3%        | 100.0%       |
|       |                                                   |                         | Upper | 40.7%       | 71.2%        | 100.0%       |
|       | % within case control group                       | Unweighted Count        |       | 213         | 461          | 674          |
|       |                                                   | Estimate                |       | 100.0%      | 100.0%       | 100.0%       |
|       |                                                   | Standard Error          |       | 0.0%        | 0.0%         | 0.0%         |
|       |                                                   | 95% Confidence Interval | Lower | 100.0%      | 100.0%       | 100.0%       |
|       |                                                   |                         | Upper | 100.0%      | 100.0%       | 100.0%       |
|       | % of Total                                        | Unweighted Count        |       | 213         | 461          | 674          |
|       |                                                   | Estimate                |       | 34.5%       | 65.5%        | 100.0%       |
|       |                                                   | Standard Error          |       | 2.9%        | 2.9%         | 0.0%         |
|       |                                                   | 95% Confidence Interval | Lower | 28.8%       | 59.3%        | 100.0%       |
|       |                                                   |                         | Upper | 40.7%       | 71.2%        | 100.0%       |

|                  |     |     |     |
|------------------|-----|-----|-----|
| Unweighted Count | 213 | 461 | 674 |
|------------------|-----|-----|-----|

#### *Tests of Independence*

|                            |                  | Chi-Square | Adjusted F | df1 | df2 | Sig. |
|----------------------------|------------------|------------|------------|-----|-----|------|
| Ever told had              | Pearson          | 19.874     | 7.385      | 1   | 29  | .011 |
| osteoporosis/brittle bones | Likelihood Ratio | 23.001     | 8.547      | 1   | 29  | .007 |
| * case control group       |                  |            |            |     |     |      |

The adjusted F is a variant of the second-order Rao-Scott adjusted chi-square statistic. Significance is based on the adjusted F and its degrees of freedom.

#### *Measures of Association*

|                            |            | Estimate | 95% Confidence Interval |        |
|----------------------------|------------|----------|-------------------------|--------|
|                            |            |          | Lower                   | Upper  |
| Ever told had              | Odds Ratio | 4.193    | 1.320                   | 13.327 |
| osteoporosis/brittle bones |            |          |                         |        |
| * case control group       |            |          |                         |        |

Statistics are computed only for 2-by-2 tables with all cells observed.

*Descriptive Estimates by Treatment Group*

|                               |      |                                  |          |                | 95% Confidence Interval |         |                  |
|-------------------------------|------|----------------------------------|----------|----------------|-------------------------|---------|------------------|
| Ever treated for osteoporosis |      |                                  | Estimate | Standard Error | Lower                   | Upper   | Unweighted Count |
| No                            | Mean | Age at Screening                 | 61.57    | 1.667          | 58.16                   | 64.99   | 123              |
|                               |      | Bone alkaline phosphatase (ug/L) | 15.9278  | 1.00187        | 13.8721                 | 17.9835 | 94               |
|                               |      | N-telopeptides (NTx) (nmol BCE)  | 397.85   | 51.068         | 293.06                  | 502.63  | 100              |
| Yes                           | Mean | Age at Screening                 | 66.51    | 1.292          | 63.86                   | 69.16   | 302              |
|                               |      | Bone alkaline phosphatase (ug/L) | 15.5739  | .74029         | 14.0550                 | 17.0929 | 226              |
|                               |      | N-telopeptides (NTx) (nmol BCE)  | 286.28   | 23.268         | 238.53                  | 334.02  | 232              |

*Mean Differences Between Case-Control Groups by Treatment Status*

|                    |                                  | Ever treated for osteoporosis | N      | Mean    | Std. Deviation | Std. Error Mean | p-value |
|--------------------|----------------------------------|-------------------------------|--------|---------|----------------|-----------------|---------|
| Case control group | Age at Screening                 | No                            | 33398  | 79.00   | .000           | .000            |         |
|                    |                                  | Yes                           | 170488 | 62.95   | 16.863         | .041            | <0.001  |
|                    | Bone alkaline phosphatase (ug/L) | No                            | 33398  | 15.0000 | .00000         | .00000          |         |
|                    |                                  | Yes                           | 167141 | 11.6269 | 3.87592        | .00948          | <0.001  |
| Injury             | N-telopeptides (NTx) (nmol BCE)  | No                            | 33398  | 391.00  | .000           | .000            |         |
|                    |                                  | Yes                           | 107972 | 315.44  | 286.382        | .872            | <0.001  |
|                    | Age at Screening                 | No                            | 508802 | 62.89   | 15.217         | .021            |         |
|                    |                                  | Yes                           | 910556 | 64.23   | 19.382         | .020            | <0.001  |
|                    | Bone alkaline phosphatase (ug/L) | No                            | 427694 | 15.2036 | 4.07621        | .00623          |         |
|                    |                                  | Yes                           | 546565 | 19.4637 | 7.72564        | .01045          | <0.001  |
|                    | N-telopeptides (NTx) (nmol BCE)  | No                            | 427694 | 575.14  | 556.759        | .851            |         |
|                    |                                  | Yes                           | 521207 | 392.85  | 346.420        | .480            | <0.001  |

*Ever treated for osteoporosis \* case control group*

|                               |                 |                         |       | case control group |            |            |
|-------------------------------|-----------------|-------------------------|-------|--------------------|------------|------------|
| Ever treated for osteoporosis |                 |                         |       | control            | injury     | Total      |
| No                            | Population Size | Estimate                |       | 33398.000          | 508802.000 | 542200.000 |
|                               |                 | Standard Error          |       | 33398.000          | 133875.970 | 143122.329 |
|                               |                 | 95% Confidence Interval | Lower | -34908.580         | 234994.899 | 249481.970 |
|                               |                 |                         | Upper | 101704.580         | 782609.101 | 834918.030 |
|                               |                 | Unweighted Count        |       | 1                  | 20         | 21         |
|                               |                 | Estimate                |       | 6.2%               | 93.8%      | 100.0%     |

|       |                                        |                         |       |            |             |             |
|-------|----------------------------------------|-------------------------|-------|------------|-------------|-------------|
| Yes   | % within Ever treated for osteoporosis | Standard Error          |       | 5.7%       | 5.7%        | 0.0%        |
|       |                                        | 95% Confidence Interval | Lower | 0.9%       | 66.7%       | 100.0%      |
|       |                                        |                         | Upper | 33.3%      | 99.1%       | 100.0%      |
|       |                                        | Unweighted Count        |       | 1          | 20          | 21          |
|       | % within case control group            | Estimate                |       | 16.4%      | 35.8%       | 33.4%       |
|       |                                        | Standard Error          |       | 9.7%       | 6.2%        | 5.5%        |
|       |                                        | 95% Confidence Interval | Lower | 4.4%       | 24.3%       | 23.2%       |
|       |                                        |                         | Upper | 45.4%      | 49.2%       | 45.4%       |
|       |                                        | Unweighted Count        |       | 1          | 20          | 21          |
|       | % of Total                             | Estimate                |       | 2.1%       | 31.3%       | 33.4%       |
|       |                                        | Standard Error          |       | 1.9%       | 5.5%        | 5.5%        |
|       |                                        | 95% Confidence Interval | Lower | 0.3%       | 21.3%       | 23.2%       |
|       |                                        |                         | Upper | 13.1%      | 43.6%       | 45.4%       |
|       |                                        | Unweighted Count        |       | 1          | 20          | 21          |
|       | Population Size                        | Estimate                |       | 170488.000 | 910556.000  | 1081044.000 |
|       |                                        | Standard Error          |       | 82532.966  | 179951.559  | 176963.152  |
|       |                                        | 95% Confidence Interval | Lower | 1689.132   | 542513.737  | 719113.716  |
|       |                                        |                         | Upper | 339286.868 | 1278598.263 | 1442974.284 |
|       |                                        | Unweighted Count        |       | 6          | 45          | 51          |
|       | % within Ever treated for osteoporosis | Estimate                |       | 15.8%      | 84.2%       | 100.0%      |
|       |                                        | Standard Error          |       | 7.6%       | 7.6%        | 0.0%        |
|       |                                        | 95% Confidence Interval | Lower | 5.5%       | 62.5%       | 100.0%      |
|       |                                        |                         | Upper | 37.5%      | 94.5%       | 100.0%      |
|       |                                        | Unweighted Count        |       | 6          | 45          | 51          |
|       | % within case control group            | Estimate                |       | 83.6%      | 64.2%       | 66.6%       |
|       |                                        | Standard Error          |       | 9.7%       | 6.2%        | 5.5%        |
|       |                                        | 95% Confidence Interval | Lower | 54.6%      | 50.8%       | 54.6%       |
|       |                                        |                         | Upper | 95.6%      | 75.7%       | 76.8%       |
|       |                                        | Unweighted Count        |       | 6          | 45          | 51          |
|       | % of Total                             | Estimate                |       | 10.5%      | 56.1%       | 66.6%       |
|       |                                        | Standard Error          |       | 5.0%       | 7.4%        | 5.5%        |
|       |                                        | 95% Confidence Interval | Lower | 3.8%       | 40.9%       | 54.6%       |
|       |                                        |                         | Upper | 25.7%      | 70.2%       | 76.8%       |
|       |                                        | Unweighted Count        |       | 6          | 45          | 51          |
| Total | Population Size                        | Estimate                |       | 203886.000 | 1419358.000 | 1623244.000 |

|                                        |                         |       |            |             |             |
|----------------------------------------|-------------------------|-------|------------|-------------|-------------|
|                                        | Standard Error          |       | 110013.343 | 258323.051  | 269077.934  |
|                                        | 95% Confidence Interval | Lower | -21116.550 | 891028.039  | 1072917.834 |
|                                        |                         | Upper | 428888.550 | 1947687.961 | 2173570.166 |
|                                        | Unweighted Count        |       | 7          | 65          | 72          |
| % within Ever treated for osteoporosis | Estimate                |       | 12.6%      | 87.4%       | 100.0%      |
|                                        | Standard Error          |       | 6.5%       | 6.5%        | 0.0%        |
|                                        | 95% Confidence Interval | Lower | 4.1%       | 67.6%       | 100.0%      |
|                                        |                         | Upper | 32.4%      | 95.9%       | 100.0%      |
|                                        | Unweighted Count        |       | 7          | 65          | 72          |
| % within case control group            | Estimate                |       | 100.0%     | 100.0%      | 100.0%      |
|                                        | Standard Error          |       | 0.0%       | 0.0%        | 0.0%        |
|                                        | 95% Confidence Interval | Lower | 100.0%     | 100.0%      | 100.0%      |
|                                        |                         | Upper | 100.0%     | 100.0%      | 100.0%      |
|                                        | Unweighted Count        |       | 7          | 65          | 72          |
| % of Total                             | Estimate                |       | 12.6%      | 87.4%       | 100.0%      |
|                                        | Standard Error          |       | 6.5%       | 6.5%        | 0.0%        |
|                                        | 95% Confidence Interval | Lower | 4.1%       | 67.6%       | 100.0%      |
|                                        |                         | Upper | 32.4%      | 95.9%       | 100.0%      |
|                                        | Unweighted Count        |       | 7          | 65          | 72          |

#### Tests of Independence

|                                                    |                  | Chi-Square | Adjusted F | df1 | df2 | Sig. |
|----------------------------------------------------|------------------|------------|------------|-----|-----|------|
| Ever treated for osteoporosis * case control group | Pearson          | 1.347      | 2.231      | 1   | 29  | .146 |
|                                                    | Likelihood Ratio | 1.499      | 2.481      | 1   | 29  | .126 |

The adjusted F is a variant of the second-order Rao-Scott adjusted chi-square statistic. Significance is based on the adjusted F and its degrees of freedom.

#### Measures of Association

|                                                                         |            | 95% Confidence Interval |       |       |
|-------------------------------------------------------------------------|------------|-------------------------|-------|-------|
|                                                                         |            | Estimate                | Lower | Upper |
| Ever treated for<br>osteoporosis * case control<br>group                | Odds Ratio | .351                    | .079  | 1.552 |
| Statistics are computed only for 2-by-2 tables with all cells observed. |            |                         |       |       |

*Odds Ratio for Functional Difficulty Count by E2 Level*

|                                                     |           | 95% Confidence Interval |       |       |
|-----------------------------------------------------|-----------|-------------------------|-------|-------|
| Units of Change                                     | LowE2     | Odds Ratio              | Lower | Upper |
| Total functional difficulty                         | 1.000 Yes | .909                    | .862  | .959  |
| Dependent Variable: LOWE2 (reference category = No) |           |                         |       |       |

*Odds Ratio for Pain Count by E2 Level*

|                                                     |           | 95% Confidence Interval |       |       |
|-----------------------------------------------------|-----------|-------------------------|-------|-------|
| Units of Change                                     | LowE2     | Odds Ratio              | Lower | Upper |
| Total pain count                                    | 1.000 Yes | .957                    | .919  | .996  |
| Dependent Variable: LOWE2 (reference category = No) |           |                         |       |       |

*Odds Ratio for Functional Difficulty Count by FSH Level*

|                                                                                            |                                              | 95% Confidence Interval |       |       |
|--------------------------------------------------------------------------------------------|----------------------------------------------|-------------------------|-------|-------|
| Units of Change                                                                            | Low follicle stimulating hormone (< 14 IU/L) | Odds Ratio              | Lower | Upper |
| Total functional difficulty                                                                | 1.000 Yes                                    | .798                    | .709  | .898  |
| Dependent Variable: Low follicle stimulating hormone (< 14 IU/L) (reference category = No) |                                              |                         |       |       |
